# Supplementary material for: The cubyl cation rearrangements
Source: Royal Society of Chemistry journal article supplement (doi:10.1039/c5cc10568d), 2016-01-01
Supplement: c5cc10568d3.pdf [file c5cc10568d3.pdf]

## Supporting Information

### The Cubyl Cation Rearrangements

*Said Jalife,<sup>1</sup> Sukanta Mondal,<sup>1</sup> Jose Luis Cabellos,<sup>1</sup> Gerardo Martinez-Guajardo,<sup>1,2</sup> Maria  
A. Fernandez-Herrera<sup>\*1</sup> and Gabriel Merino.<sup>\*1</sup>*

<sup>1</sup>Departamento de Física Aplicada, Centro de Investigación y de Estudios Avanzados,  
97310 Mérida, Yucatán (México).

<sup>2</sup>Unidad Académica de Ciencias Químicas, Área de Ciencias de la Salud, Universidad  
Autónoma de Zacatecas, Km. 6 carretera Zacatecas-Guadalajara s/n, Ejido La Escondida C.  
P. 98160, Zacatecas, Zac., México.

**Cartesian Coordinates for all optimized structures computed at the MP2/def2-TZVP level.**

**1**

|   |              |              |              |
|---|--------------|--------------|--------------|
| C | 1.146536000  | 0.661953000  | -0.497732000 |
| C | 0.000000000  | 1.296992000  | 0.377236000  |
| C | -1.146536000 | 0.661953000  | -0.497732000 |
| C | 0.000000000  | 0.000000000  | -1.192436000 |
| H | 2.038310000  | 1.176819000  | -0.836925000 |
| H | 0.000000000  | 2.342797000  | 0.670746000  |
| H | -2.038310000 | 1.176819000  | -0.836925000 |
| C | 1.123228000  | -0.648496000 | 0.377236000  |
| C | 0.000000000  | 0.000000000  | 1.248176000  |
| C | -1.123228000 | -0.648496000 | 0.377236000  |
| C | 0.000000000  | -1.323906000 | -0.497732000 |
| H | 2.028922000  | -1.171398000 | 0.670746000  |
| H | 0.000000000  | 0.000000000  | 2.333012000  |
| H | -2.028922000 | -1.171398000 | 0.670746000  |
| H | 0.000000000  | -2.353637000 | -0.836925000 |

**TS<sub>1-2</sub>**

|   |              |              |              |
|---|--------------|--------------|--------------|
| C | -1.288938000 | 0.140139000  | -0.755289000 |
| C | -0.178809000 | -1.279454000 | -0.106395000 |
| C | 1.026533000  | -0.654744000 | -0.725994000 |
| C | 0.120911000  | 0.528713000  | -1.102788000 |
| H | -2.149344000 | 0.004521000  | -1.405777000 |
| H | -0.730684000 | -2.195907000 | -0.293747000 |
| H | 1.759597000  | -1.132961000 | -1.365562000 |
| C | -1.289885000 | 0.349992000  | 0.668454000  |
| C | -0.066467000 | -0.455664000 | 1.156638000  |
| C | 1.273960000  | 0.202073000  | 0.604413000  |
| C | 0.564784000  | 1.355577000  | -0.046991000 |
| H | -2.183101000 | 0.505306000  | 1.279180000  |
| H | -0.112705000 | -0.894462000 | 2.150523000  |
| H | 2.183946000  | 0.247548000  | 1.198745000  |
| H | 0.259762000  | 2.346152000  | 0.284354000  |

**2**

|   |              |              |              |
|---|--------------|--------------|--------------|
| C | -0.509930000 | 1.357680000  | 0.168829000  |
| C | 1.358018000  | -0.212038000 | 0.518917000  |
| C | 0.033459000  | -0.843830000 | 0.943673000  |
| C | -1.016773000 | 0.223936000  | 0.827820000  |
| H | -1.089497000 | 2.210517000  | -0.169760000 |
| H | 2.326071000  | -0.286128000 | 0.992960000  |
| H | -0.066057000 | -1.654042000 | 1.657610000  |
| C | 0.870367000  | 1.055352000  | -0.193804000 |
| C | 0.940848000  | -0.311288000 | -0.907309000 |

|   |              |              |              |
|---|--------------|--------------|--------------|
| C | -0.379533000 | -1.089391000 | -0.586727000 |
| C | -1.537819000 | -0.150189000 | -0.442718000 |
| H | 1.572167000  | 1.811511000  | -0.517685000 |
| H | 1.508821000  | -0.394690000 | -1.823842000 |
| H | -0.485281000 | -2.085705000 | -1.010294000 |
| H | -2.318040000 | 0.217145000  | -1.101085000 |

**TS<sub>2,3</sub>**

|   |              |              |              |
|---|--------------|--------------|--------------|
| C | 0.042681000  | 1.459967000  | -0.226335000 |
| C | 1.303436000  | -0.420019000 | 0.592875000  |
| C | -0.030820000 | -0.345888000 | 1.218202000  |
| C | -0.770372000 | 0.754109000  | 0.660339000  |
| H | -0.315151000 | 2.251480000  | -0.876768000 |
| H | 2.221318000  | -0.806012000 | 1.010893000  |
| H | -0.448055000 | -1.055391000 | 1.924865000  |
| C | 1.214789000  | 0.657975000  | -0.459935000 |
| C | 0.690503000  | -0.818926000 | -0.722332000 |
| C | -0.855554000 | -1.004017000 | -0.564873000 |
| C | -1.718447000 | 0.040473000  | -0.208763000 |
| H | 2.070980000  | 0.946647000  | -1.053636000 |
| H | 1.214228000  | -1.445936000 | -1.437579000 |
| H | -1.225943000 | -1.982407000 | -0.874986000 |
| H | -2.774664000 | 0.149570000  | -0.427865000 |

**3**

|   |              |              |              |
|---|--------------|--------------|--------------|
| C | -0.756218000 | 0.296596000  | 1.142253000  |
| C | -0.756218000 | -1.072533000 | -0.735164000 |
| C | -0.756218000 | 0.296596000  | -1.142253000 |
| C | -0.519498000 | 1.091614000  | 0.000000000  |
| H | -0.546330000 | 0.632473000  | 2.152718000  |
| H | -0.947757000 | -1.948268000 | -1.339165000 |
| H | -0.546330000 | 0.632473000  | -2.152718000 |
| C | -0.756218000 | -1.072533000 | 0.735164000  |
| C | 0.699469000  | -1.013108000 | 0.000000000  |
| C | 1.535722000  | 0.291568000  | 0.000000000  |
| C | 0.927977000  | 1.506225000  | 0.000000000  |
| H | -0.947757000 | -1.948268000 | 1.339165000  |
| H | 1.255342000  | -1.951779000 | 0.000000000  |
| H | 2.614116000  | 0.160571000  | 0.000000000  |
| H | 1.405924000  | 2.476252000  | 0.000000000  |

**TS<sub>3,4</sub>**

|   |              |              |              |
|---|--------------|--------------|--------------|
| C | 0.241083000  | -0.003266000 | 1.323190000  |
| C | 1.291640000  | -0.410547000 | -0.682574000 |
| C | 0.220219000  | -1.336021000 | -0.545326000 |
| C | -0.553869000 | -0.902165000 | 0.545053000  |
| H | -0.131608000 | 0.541991000  | 2.184118000  |
| H | 2.035835000  | -0.362967000 | -1.465561000 |

|   |              |              |              |
|---|--------------|--------------|--------------|
| H | -0.186572000 | -1.919079000 | -1.363889000 |
| C | 1.365342000  | 0.380556000  | 0.544959000  |
| C | 0.350141000  | 1.072651000  | -0.493007000 |
| C | -1.175442000 | 0.934826000  | -0.482691000 |
| C | -1.764030000 | -0.159123000 | 0.070349000  |
| H | 2.209557000  | 0.987219000  | 0.842569000  |
| H | 0.750796000  | 2.004190000  | -0.900502000 |
| H | -1.719057000 | 1.718509000  | -1.002226000 |
| H | -2.809463000 | -0.431331000 | 0.025775000  |

**4**

|   |              |              |              |
|---|--------------|--------------|--------------|
| C | 0.768418000  | -0.551041000 | 0.000000000  |
| C | -0.341981000 | -0.079541000 | 2.012667000  |
| C | -0.341981000 | 1.120496000  | 1.242707000  |
| C | 0.217984000  | 0.833371000  | 0.000000000  |
| H | 1.871066000  | -0.543823000 | 0.000000000  |
| H | -0.767333000 | -0.178830000 | 3.002909000  |
| H | -0.849528000 | 2.039977000  | 1.514044000  |
| C | 0.239539000  | -1.094932000 | 1.286410000  |
| C | 0.239539000  | -1.094932000 | -1.286410000 |
| C | -0.341981000 | -0.079541000 | -2.012667000 |
| C | -0.341981000 | 1.120496000  | -1.242707000 |
| H | 0.388654000  | -2.112366000 | 1.627576000  |
| H | 0.388654000  | -2.112366000 | -1.627576000 |
| H | -0.767333000 | -0.178830000 | -3.002909000 |
| H | -0.849528000 | 2.039977000  | -1.514044000 |

**TS<sub>1-1</sub>**

|   |              |              |              |
|---|--------------|--------------|--------------|
| C | 0.000000000  | 0.745468000  | 0.959312000  |
| C | 1.227370000  | 0.772308000  | 0.062775000  |
| C | 1.227370000  | -0.772308000 | 0.062775000  |
| C | 0.000000000  | -0.745468000 | 0.959312000  |
| H | 0.000000000  | 0.000000000  | 2.045079000  |
| H | 2.036731000  | 1.494215000  | 0.045878000  |
| H | 2.036731000  | -1.494215000 | 0.045878000  |
| C | -1.227370000 | 0.772308000  | 0.062775000  |
| C | 0.000000000  | 0.757536000  | -0.968789000 |
| C | 0.000000000  | -0.757536000 | -0.968789000 |
| C | -1.227370000 | -0.772308000 | 0.062775000  |
| H | -2.036731000 | 1.494215000  | 0.045878000  |
| H | 0.000000000  | 1.441902000  | -1.810737000 |
| H | 0.000000000  | -1.441902000 | -1.810737000 |
| H | -2.036731000 | -1.494215000 | 0.045878000  |

**TS<sub>4,4</sub>**

|   |              |              |              |
|---|--------------|--------------|--------------|
| C | -0.723771000 | 0.005072000  | -0.310466000 |
| C | -0.026682000 | -2.127951000 | 0.166574000  |
| C | 1.132994000  | -1.358201000 | 0.000289000  |
| C | 0.737853000  | -0.016173000 | -0.300937000 |
| H | 0.014219000  | -0.010225000 | -1.416604000 |
| H | -0.043246000 | -3.193811000 | 0.351044000  |
| H | 2.152029000  | -1.718780000 | 0.071628000  |
| C | -1.161344000 | -1.325307000 | -0.015625000 |
| C | -1.122171000 | 1.349858000  | -0.026137000 |
| C | 0.035433000  | 2.120748000  | 0.149068000  |
| C | 1.172165000  | 1.316346000  | -0.011194000 |
| H | -2.191204000 | -1.656479000 | 0.041320000  |
| H | -2.141917000 | 1.711352000  | 0.028479000  |
| H | 0.049868000  | 3.188132000  | 0.324700000  |
| H | 2.201310000  | 1.647670000  | 0.056736000  |

**TS<sub>1,2'</sub>**

|   |              |              |              |
|---|--------------|--------------|--------------|
| H | 2.381201000  | -0.952550000 | -0.909084000 |
| C | 1.570438000  | -0.523572000 | -0.327337000 |
| C | -0.396767000 | -0.521238000 | -0.902941000 |
| H | 1.773474000  | 1.728837000  | 0.121163000  |
| H | -0.423021000 | 1.630705000  | -1.587947000 |
| C | 1.119165000  | 0.869581000  | 0.024629000  |
| C | -0.194593000 | 0.938638000  | -0.783969000 |
| C | 0.512110000  | -1.091808000 | 0.430545000  |
| C | -1.619468000 | -0.660128000 | -0.249485000 |
| H | 0.308334000  | -2.125256000 | 0.691800000  |
| H | -2.184147000 | -1.519448000 | 0.092431000  |
| C | 0.168308000  | 0.259983000  | 1.150457000  |
| C | -1.213642000 | 0.644687000  | 0.413531000  |
| H | 0.381410000  | 0.382298000  | 2.211041000  |
| H | -1.910555000 | 1.358558000  | 0.848002000  |

**2'**

|   |              |              |              |
|---|--------------|--------------|--------------|
| H | 2.103551000  | 0.133227000  | -1.731476000 |
| C | 1.584921000  | 0.003611000  | -0.789900000 |
| C | -1.341201000 | 0.252893000  | -0.815826000 |
| H | 1.378142000  | 1.865806000  | 0.483753000  |
| H | -1.121947000 | 2.163483000  | 0.154755000  |
| C | 0.872625000  | 0.983135000  | 0.100798000  |
| C | -0.635910000 | 1.247635000  | -0.175308000 |
| C | 1.327475000  | -1.055952000 | 0.007152000  |
| C | -1.558594000 | -0.962640000 | -0.415156000 |
| H | 1.565414000  | -2.111317000 | -0.044112000 |
| H | -1.889034000 | -1.949332000 | -0.690568000 |
| C | 0.553995000  | -0.239683000 | 1.008450000  |
| C | -0.994790000 | -0.222072000 | 0.780632000  |

|   |              |              |             |
|---|--------------|--------------|-------------|
| H | 0.809770000  | -0.220141000 | 2.066071000 |
| H | -1.697028000 | 0.076710000  | 1.556525000 |
